# Supplementary material
Source: PubMed Central journal article supplement (PMC3047619)
Supplement: cc0917_3552SD1.pdf [file cc0917_3552SD1.pdf]

**Supplemental Fig. 1.** PIC cannot be introduced to H9 cells without TR. **Top left**, H9 cells were treated with 50  $\mu\text{g}/\text{mL}$  PIC for 6 hrs. **Top middle**, 2  $\mu\text{g}/\text{mL}$  PIC can be delivered into H9 cells efficiently by transfection with Fugene HD. **Top right**, HeLa cells were treated with 50  $\mu\text{g}/\text{mL}$  PIC for 6 hrs. Note that direct delivery of PIC leads similar cytoplasmic dots in HeLa cells as transfection does, but this is not the case in H9 cells. **Bottom**, 2  $\mu\text{g}/\text{mL}$  or 50  $\mu\text{g}/\text{mL}$  PIC were directly added to HeLa and H9 cells for 6 hrs and IFN $\beta$  responses were quantitatively measured by RT-QPCR and normalized to each endogenous *actin* mRNA. Experiments were at least duplicated and error bars were calculated from three biological repeats.

**Supplemental Fig. 2.** H9 cells on feeder cells do not respond to PIC. H9 cells were plated to the 8 days old irr-MEFs, and 4 days after plating, a variety of PIC treatments were performed to the H9 cells on irr-MEFs for 24 hrs. IFN $\beta$  responses were quantitatively measured by RT-QPCR and normalized to each endogenous *actin* mRNA. Note that 12-day old irr-MEFs (the last column) show a weak IFN $\beta$  response with high concentration (10  $\mu\text{g}/\text{mL}$ ) of PIC transfection. Experiments were duplicated and error bars were calculated from three biological repeats.

**Supplemental Fig. 3.** H14 cells grown on feeder-free conditions do not respond to PIC. H14 cells were transfected with 2  $\mu\text{g}/\text{mL}$  PIC for 6 hrs and 24 hrs. The IFN $\beta$  responses were quantitatively measured by RT-QPCR and normalized to each endogenous *actin* mRNA. Experiments were duplicated and error bars were calculated from three biological repeats.

**Supplemental Fig. 4.** dsRNAs form cytoplasmic dots in a variety of human cell lines. Each cell line was transfected with 2  $\mu\text{g}/\text{mL}$  PIC for 6 hrs, and then stained with J2 antibody which was indicative of dsRNAs.

**Supplemental Fig. 5.** The fate of dsRNAs in human iPS cells. iPS (IMR90)-1 cells were transfected with 2  $\mu\text{g}/\text{mL}$  PIC for 24 hrs, and then stained with anti-dsRNA, J2 antibody and anti-DCP1 $\alpha$  (top row) or J2 and anti-TIA1 (bottom row). Note that dsRNA-associated cytoplasmic dots remain visible in iPS cells after 24 hrs. Also, iPS cells have large P-bodies (indicated by DCP1 $\alpha$ ) and fewer stress granules (indicated by TIA1).

Figure S1

**PIC cannot be introduced to H9 cells without transfection**

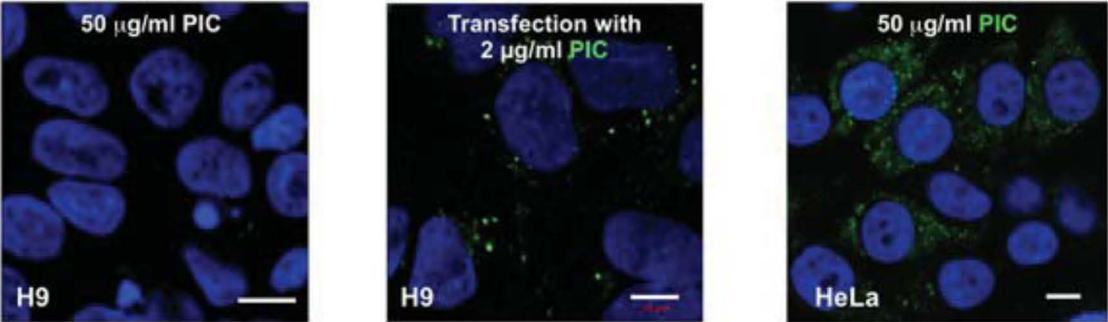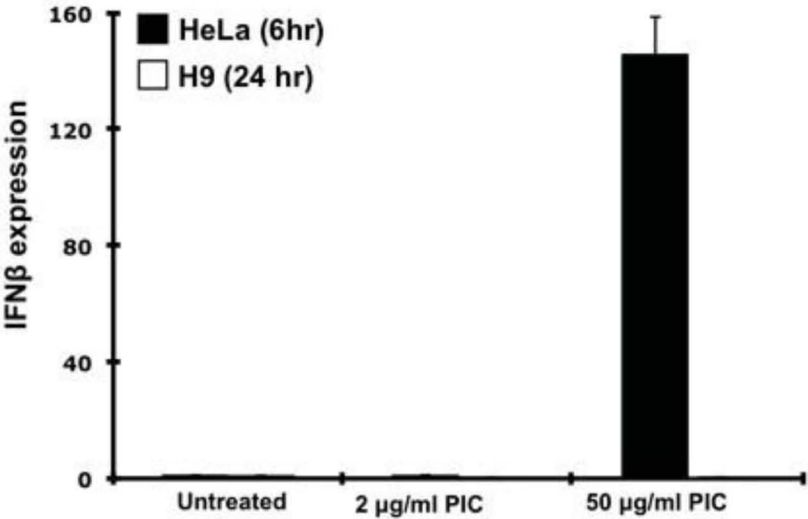

Figure S2

H9 cells on irr-MEFs do not respond to PIC

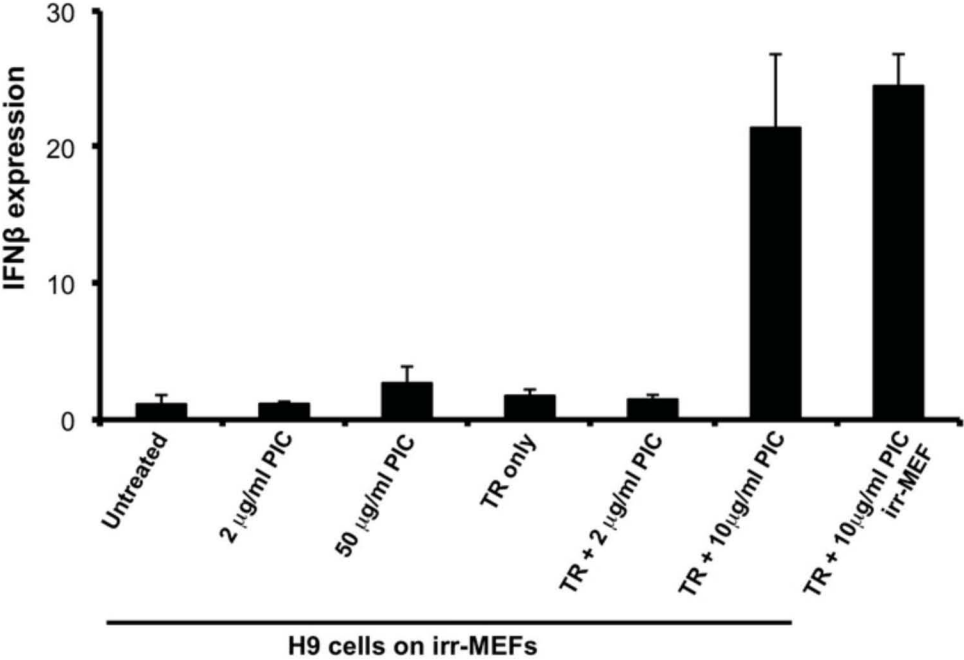

Figure S3

### H14 cells have weak IFN $\beta$ response to PIC

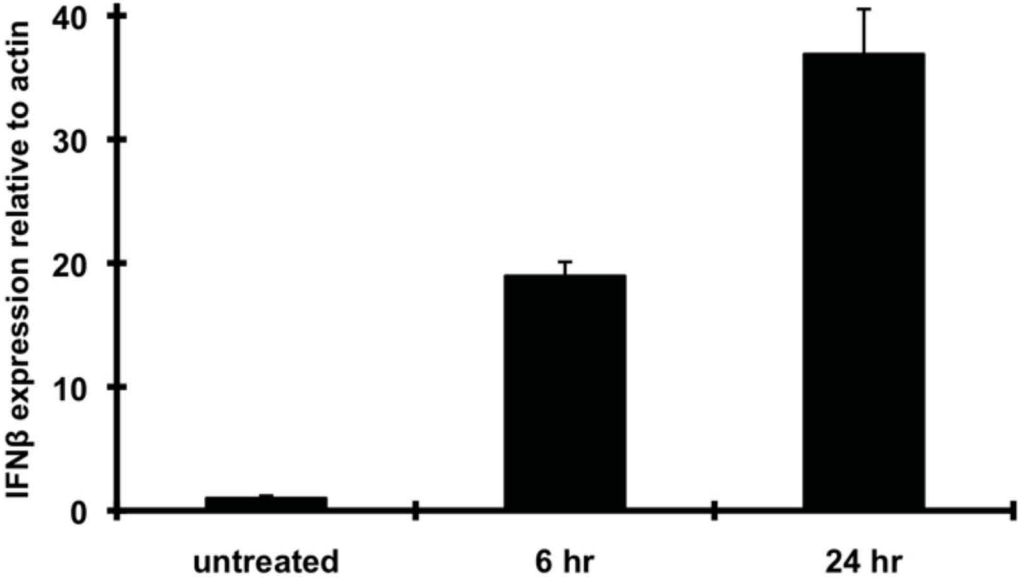

Figure S4

Cytoplasmic uptake of dsRNAs from a variety of cell lines

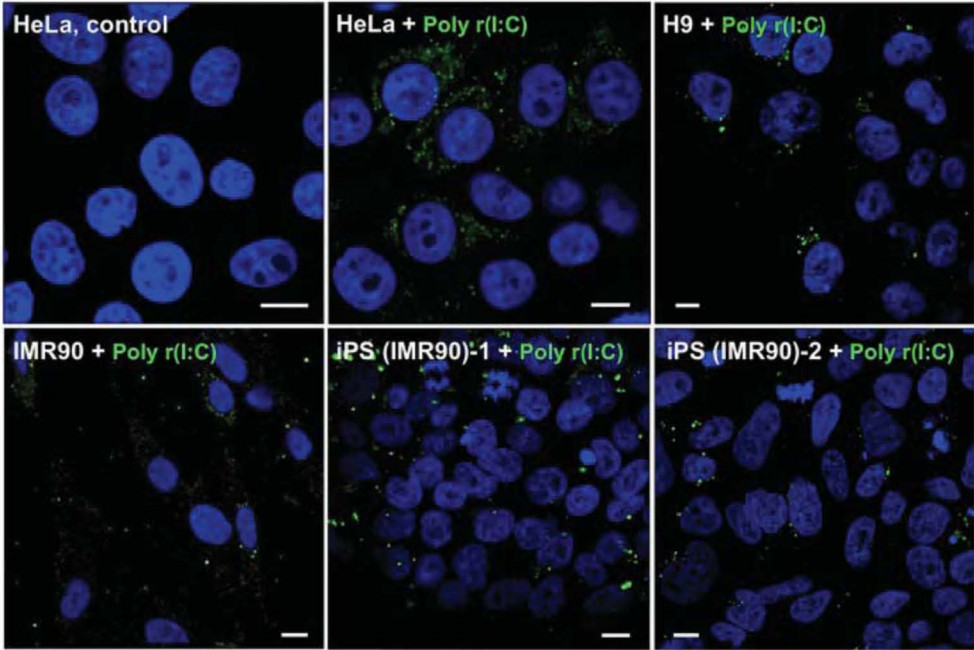

Figure S5

**iPS (IMR90)-1 cells  
(24 hr after PIC transfection)**

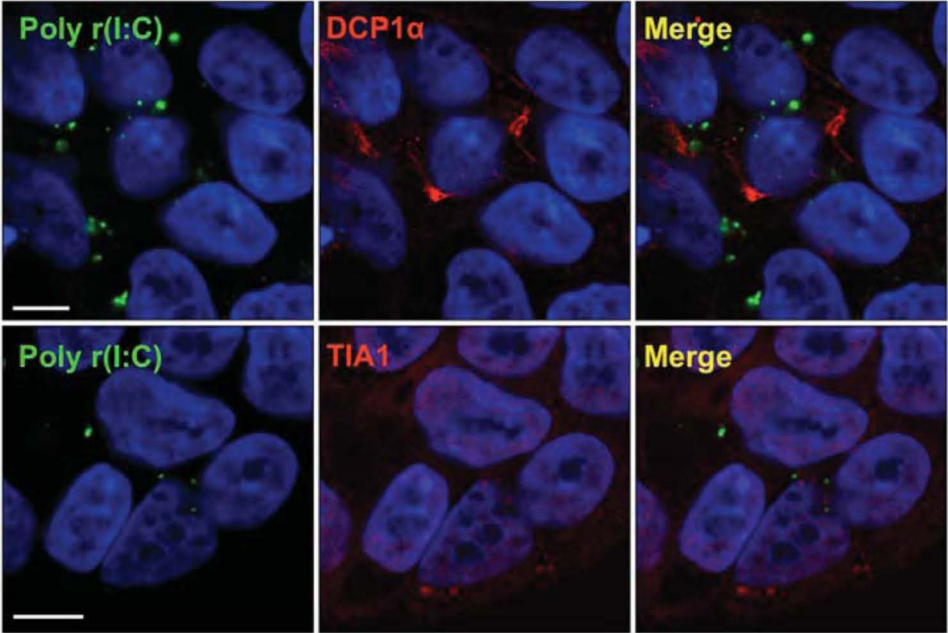

**Supplemental Table 1**  
**Relative mRNA expression of RIG-I regulators**  
**(reads per thousand bases of exon, per million reads)**

| Gene   | HeLa | H9   | Function                                             |                 |
|--------|------|------|------------------------------------------------------|-----------------|
| RNF135 | 5.1  | 3.1  | E3 ligase (1)                                        | <b>Positive</b> |
| TRIM25 | 23.6 | 9.4  | E3 ligase (2)                                        |                 |
| LGP2   | 0.06 | 0.8  | Binds RNA; competes with MDA5, RIG-I (3)             | <b>Negative</b> |
| RNF125 | 1.1  | 2.2  | RIG-I degradation (4)                                |                 |
| A20    | 6.9  | 15.5 | Inhibitor of RIG-I mediated IRF3 phosphorylation (5) |                 |
| NLRX1  | 3.4  | 6.2  | Inhibits RIG-I/IPS-1 interaction (6)                 |                 |
| CYLD   | 1.4  | 0.7  | Deubiquitinase (7)                                   |                 |
| DUBA   | 30.2 | 15.7 | Deubiquitinase (8)                                   |                 |

**References:**

1. H. Oshiumi, M. Matsumoto, S. Hatakeyama and T. Seya. (2009) Riplet/RNF135, a RING finger protein, ubiquitinates RIG-I to promote interferon beta induction during the early phase of viral infection. *J. Biol. Chem.* 284: 807-817.
2. M.U. Gack, Y.C. Shin, C.H. Joo, T. Urano, C. Liang, L. Sun, O. Takeuchi, S. Akira, Z. Chen, S. Inoue and J.U. Jung. (2007) TRIM25 RING-finger E3 ubiquitin ligase is essential for RIG-I mediated antiviral activity. *Nature* 446: 916-920.
3. S. Rothenfusser, N. Goutagny, G. DiPerna, M. Gong, B.G. Monks, A. Schoenemeyer, M. Yamamoto, S. Akira and K.A. Fitzgerald. (2005) The RNA helicase Lgp2 inhibits TLR-independent sensing of viral replication by retinoic acid-inducible gene-I. *J. Immunol.* 175: 5260-5268.
4. K. Arimoto, H. Takahashi, T. Hishiki, H. Konishi, T. Fujita and K. Shimotohno. (2007) Negative regulation of the RIG-I signaling by the ubiquitin ligase RNF125. *Procl. Natl. Acad. Aci. USA* 104: 7500-7505.
5. R. Lin, L. Yang, P. Nakhaei, Q. Sun, E. Sharif-Askari, I. Julkunen and J. Hiscott. (2006) *J. Biol. Chem.* 281: 2095-2103.
6. C.B. Moore, D.T. Bergstralh, J.A. Duncan, Y. Lei, T.E. Morrison, A.G. Zimmermann, M.A. Accavitti-Loper, V.J. Madden, L. Sun, Z. Ye, J.D. Lich, M.T. Heise, Z. Chen and J.P. Ting. (2008) NLXR1 is a regulator of mitochondrial antiviral immunity. *Nature* 451: 573-577.
7. C.S. Friedman, M. A. O'Donnell, D. Legarda-Addison, A. Ng, W.B. Cardenas, J.S. Young, T.M. Moran, C.F. Basler, A. Komuro, C.M. Horvath, R. Xavier, and A.T. Ting. (2008) The tumor suppressor CYLD is a negative regulator of RIG-I-mediated antiviral response. *EMBO Rep.* 9: 930-936.
8. N. Kayagaki, Q. Phung, S. Chan, R. Chaudhari, C. Quan, K.M. O'Rourke, M. Eby, E. Pietras, G. Cheng, J.F. Bazan, Z. Zhang, D. Arnott, and V.M. Dixit (2007) DUBA: a deubiquitinase that regulates type I interferon production. *Science* 318: 1628-1632.
